# Supplementary material
Source: publisher figshare collection journal article supplement (https://karger.figshare.com/ndownloader/files/12440234)
Supplement: Supplementary file 1 [file 12440234]

**Supplementary table 1. Multivariate logistic analyses for coronary artery disease**

| Predictor | Model 1 | | Model 2 | | Model 3 | | Model 4 | |
| --- | --- | --- | --- | --- | --- | --- | --- | --- |
| Odd ratio | *P* value | Odd ratio | *P* value | Odd ratio | *P* value | Odd ratio | *P* value |
| Age | 1.09 (1.05-1.13) | **<0.001** | 1.08 (1.04-1.12) | **<0.001** | 1.08 (1.04-1.12) | **<0.001** | 1.07 (1.03-1.12) | **<0.001** |
| Male gender | 2.8 (1.24-6.3) | **0.013** | 2.98 (1.29-6.88) | **0.011** | 3.09 (1.36-7.02) | **0.007** | 3.21 (1.38-7.44) | **0.007** |
| BMI | 1.09 (0.98-1.21) | 0.125 | 1.07 (0.95-1.19) | 0.255 | 1.07 (0.96-1.19) | 0.245 | 1.05 (0.94-1.17) | 0.386 |
| Hypertension | NI | NI | NI | NI | 2.15 (1.08-4.27) | **0.030** | 1.92 (0.95-3.87) | 0.069 |
| DM | NI | NI | 2.9 (1.43-5.87) | **0.003** | NI | NI | 2.64 (1.29-5.4) | **0.008** |
| Mild OSA | - | - | - | - | - | - | - | - |
| Moderate OSA | 1.76 (0.86-3.61) | 0.125 | 1.83 (0.88-3.81) | 0.105 | 1.6 (0.77-3.32) | 0.210 | 1.65 (0.79-3.48) | 0.185 |
| Severe OSA | 2.6 (1.13-5.98) | **0.025** | 2.44 (1.04-5.73) | **0.040** | 2.36 (1.02-5.47) | **0.046** | 2.23(0.94-5.27) | 0.068 |
| *P* values<0.05 were marked as bold.  BMI, body mass index; DM, diabetes mellitus; OSA, obstructive sleep apnea. | | | | | | | | | |
